# Supplementary material
Source: PubMed Central journal article supplement (PMC6765065)

**A**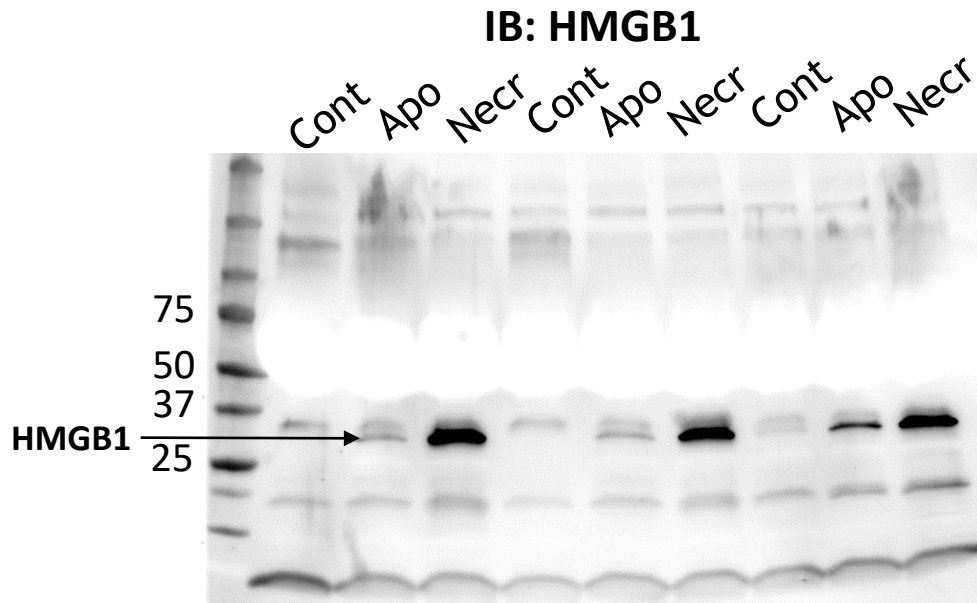

**Stain free gel for protein loading**

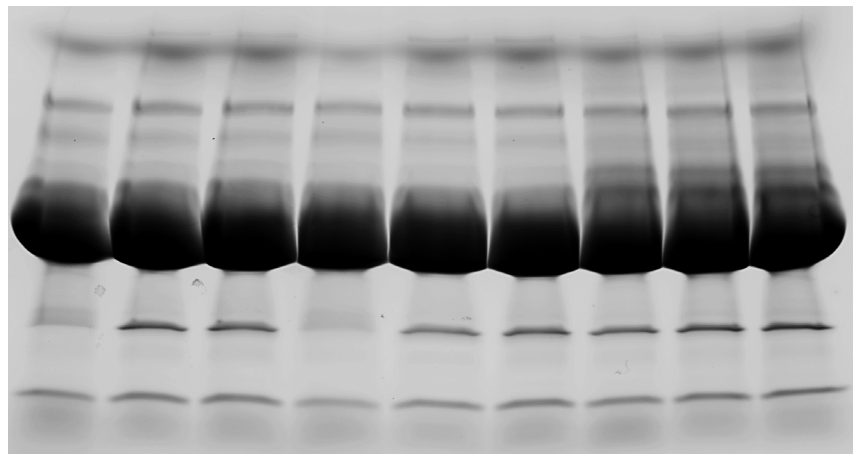

**SUPPLEMENTARY FIG. S1.** Western blot images. (A) Representative whole immunoblot of the cropped blot presented in Figure 1A. (B) Representative whole immunoblot of the cropped blot presented in Figure 1B. (C) Representative whole immunoblot of the cropped blot presented in Figure 1C. (D) Representative whole immunoblot of the cropped blot presented in Figure 1D. (E) Representative whole immunoblot of the cropped blot presented in Figure 1E. Cont – Control; Apo – apoptosis; Necr – necrosis.

**B**

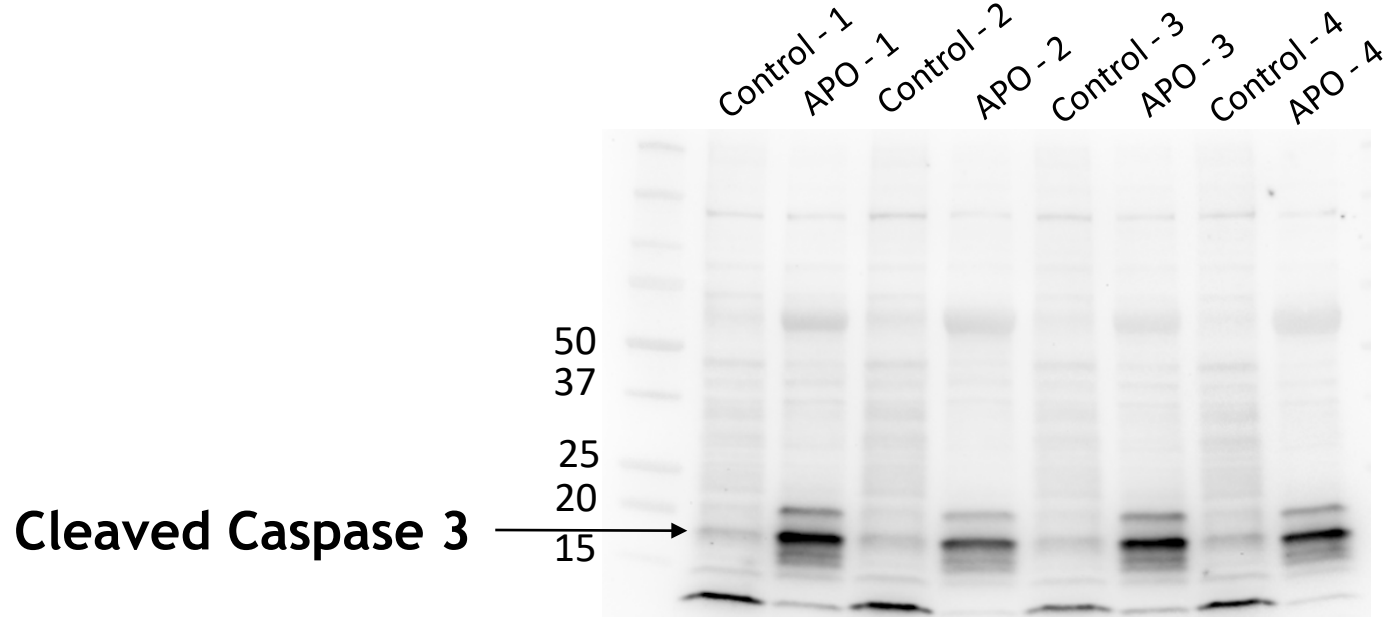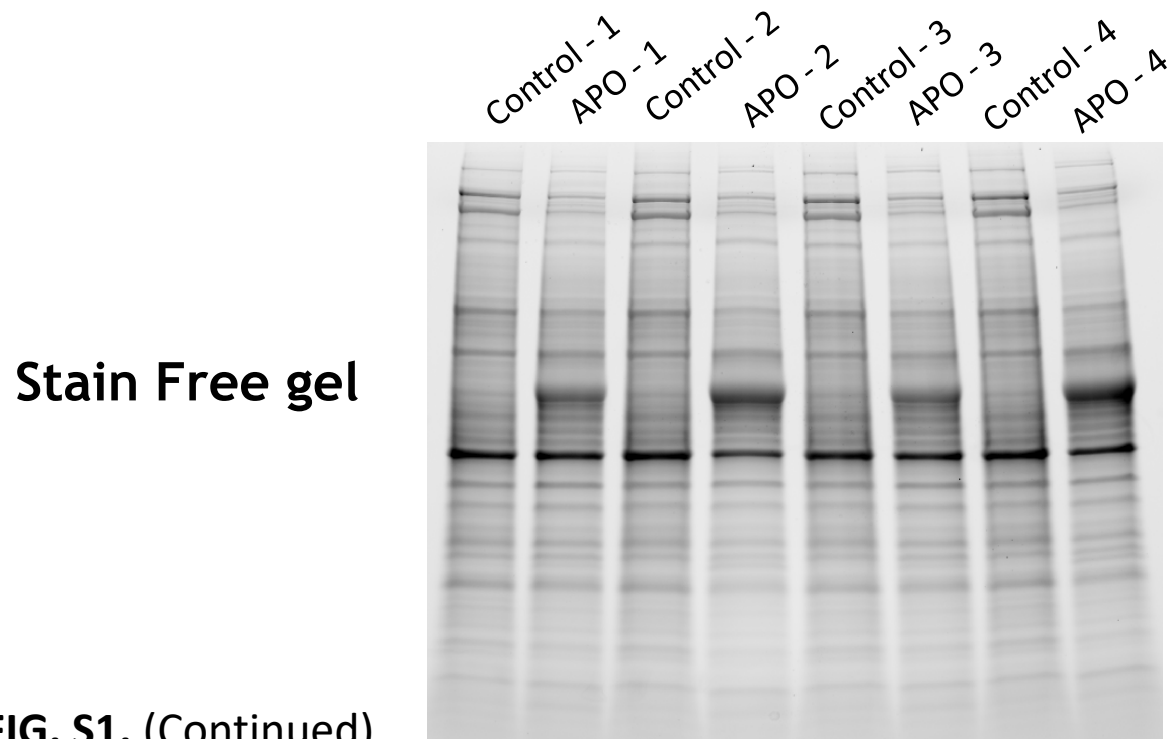

**SUPPLEMENTARY FIG. S1. (Continued)**

**C****IB: pTLR4****IB: TLR4**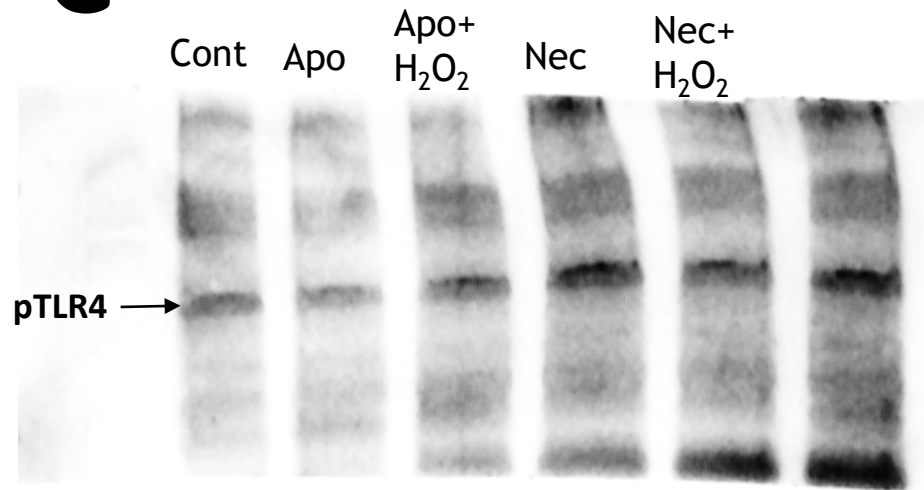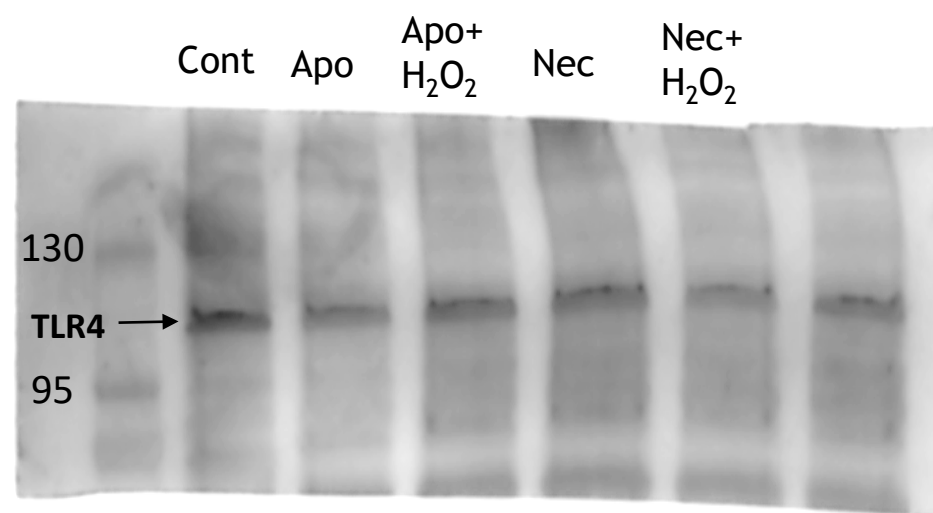**IB: GAPDH**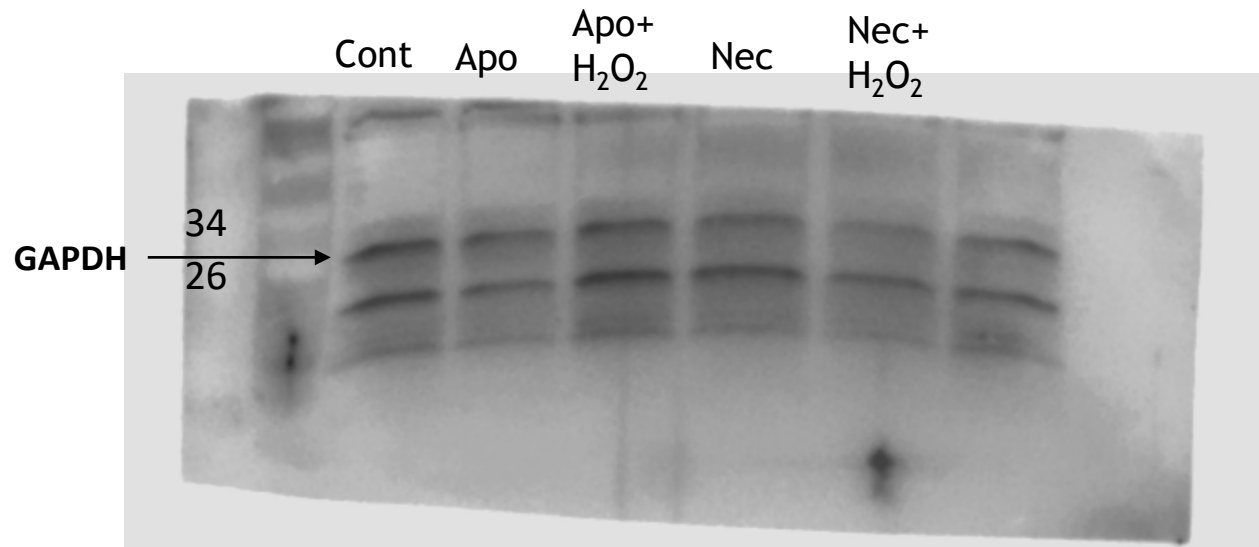**SUPPLEMENTARY FIG. S1. (Continued)**

**D****IB: IL1 $\beta$** 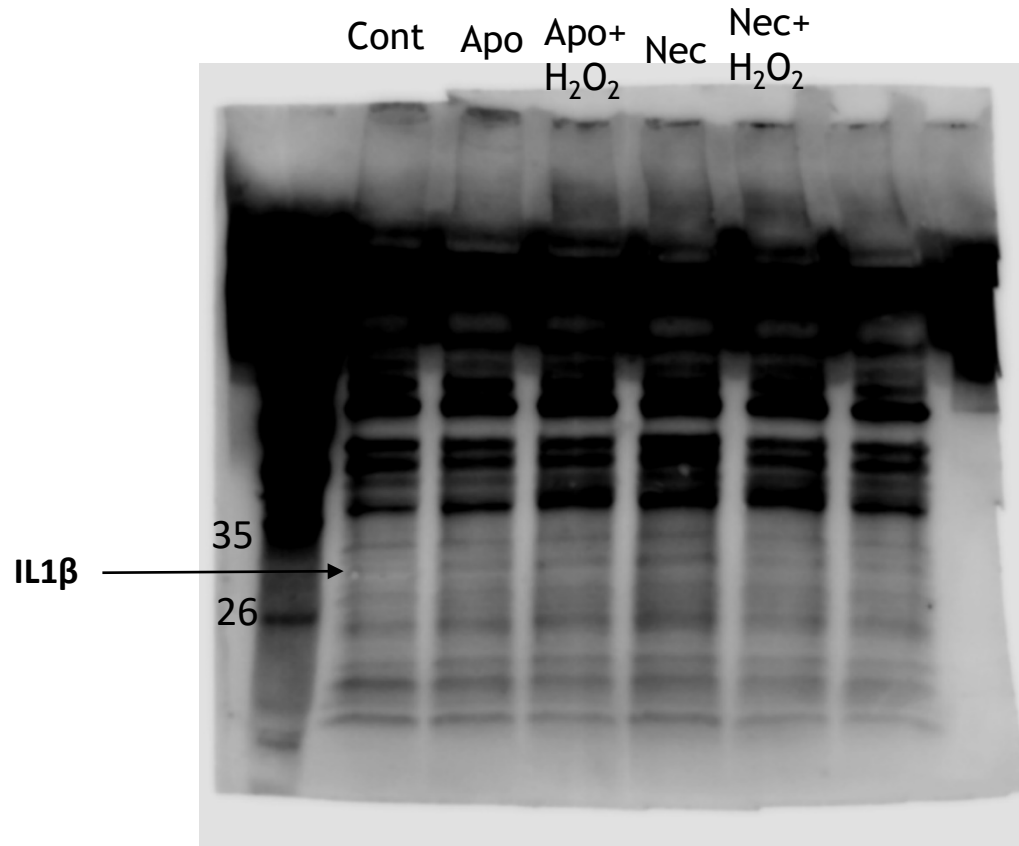**IB:  $\beta$ -actin**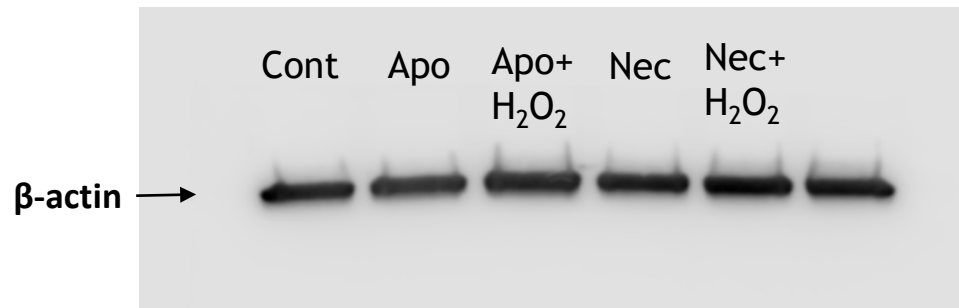**SUPPLEMENTARY FIG. S1. (Continued)**

# E

## IB: E-Selectin

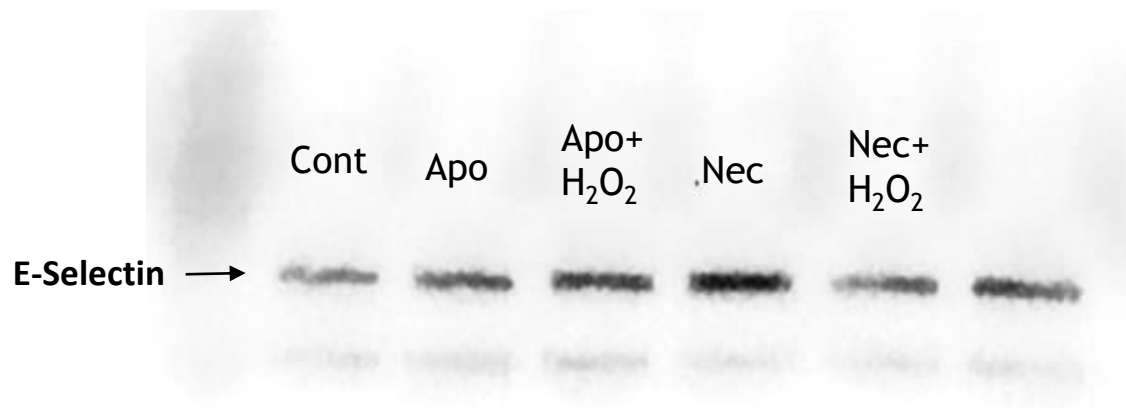

## IB: $\beta$ -actin

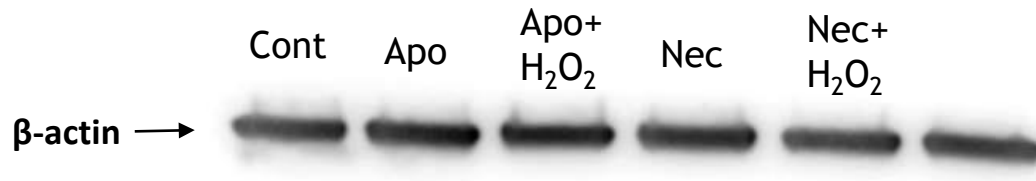

Supplement: Supp_Fig1.pdf [file Supp_Fig1.pdf]
