# Supplementary material
Source: PubMed Central journal article supplement (PMC6765065)
Supplement: Supp_Fig2.pdf [file Supp_Fig2.pdf]

# A

Representative whole lung images:

Control Male rat:

<https://histowiz.com/app/slides/25852/viewer/a01b5eee0de84d2bbf4d1f435159bab2>;

PAH Male rat:

<https://histowiz.com/app/slides/25853/viewer/3e2530dda9a14a15a8381be21637265f>;

Control Female rat:

<https://histowiz.com/app/slides/25851/viewer/74ac4a2bec094def9b921251a40c05df>;

PAH Female rat:

<https://histowiz.com/app/slides/25854/viewer/a27652bd9bcf484494d1b66e990916e9>

**SUPPLEMENTARY FIG. S2.** Representative whole lung images of pulmonary arteries presented in Fig. 2C. Magnification 1X-40X of the lungs stained by antibodies against HMGB1 and counterstained with hematoxylin.
