# Supplementary material
Source: PubMed Central journal article supplement (PMC6765065)
Supplement: Supp_Fig3.pdf [file Supp_Fig3.pdf]

**A****IB: pTLR4****IB: TLR4**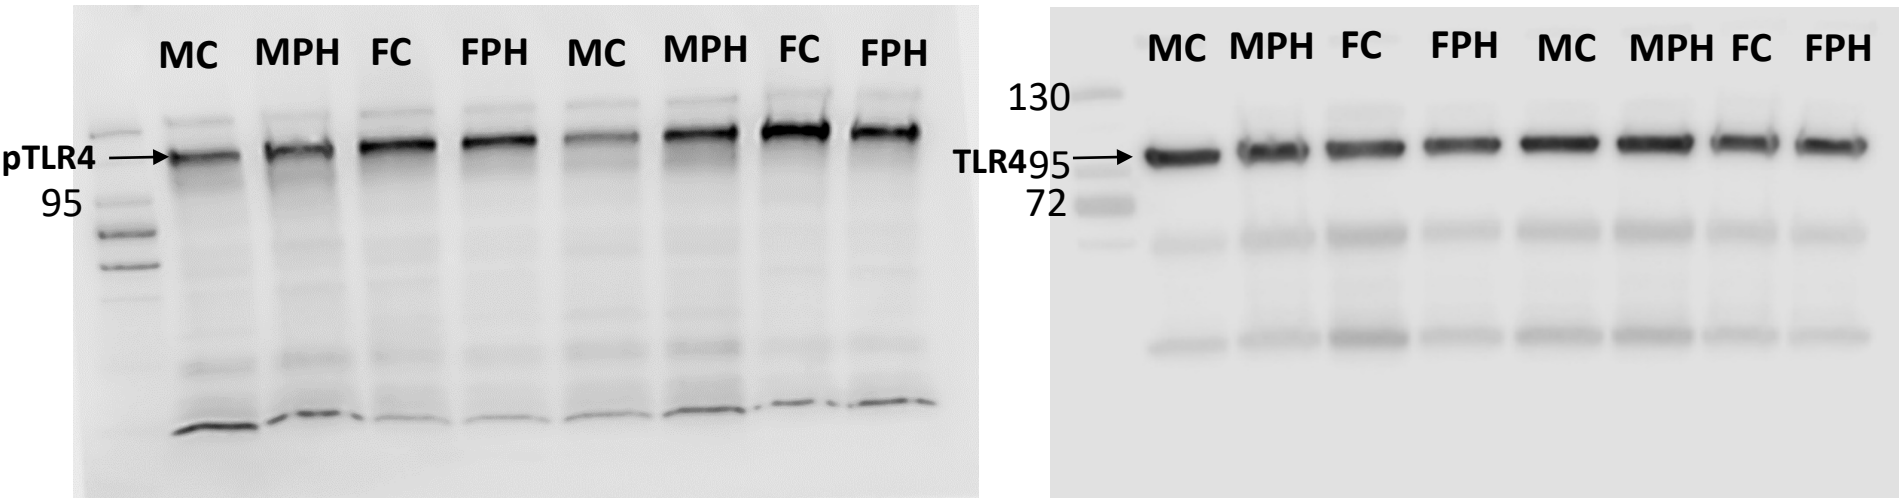**IB:  $\beta$ -actin**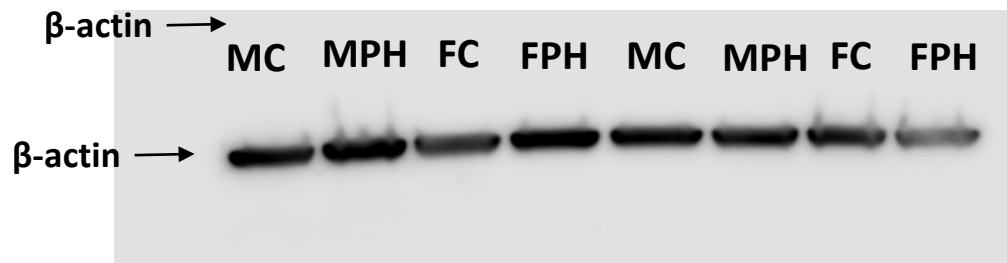

**SUPPLEMENTARY FIG. S3.** Western blot images. (A) Representative whole immunoblot of the cropped blot presented in Figure 4A. (B) Representative whole immunoblot of the cropped blot presented in Figure 4B. (C) Representative whole immunoblot of the cropped blot presented in Figure 4C. MC – male Control rat; MPH – male PAH rats FC - female Control rats FPH – female PAH rat.

**B****IB: IL1 $\beta$** 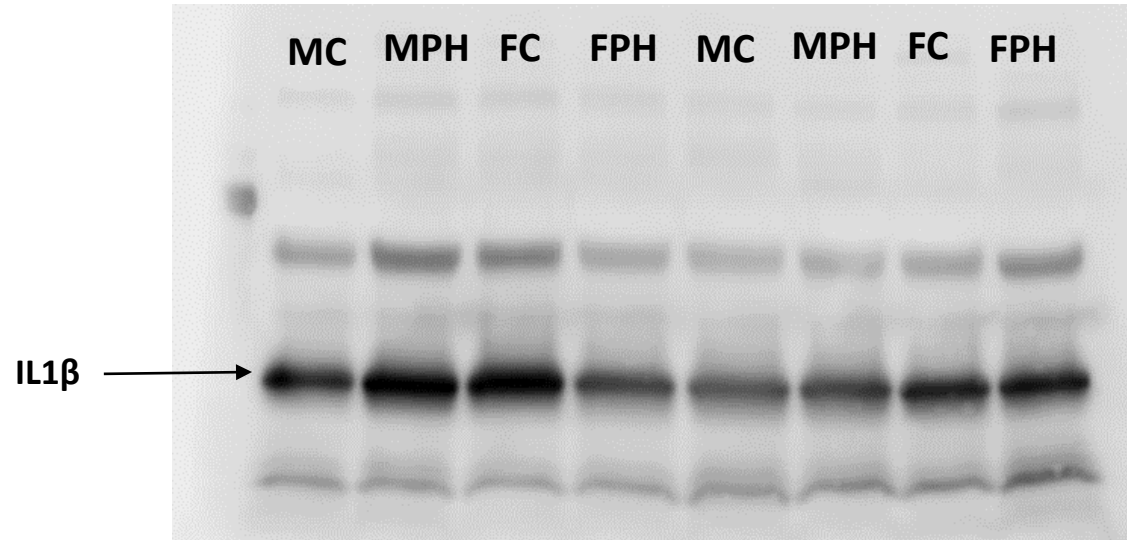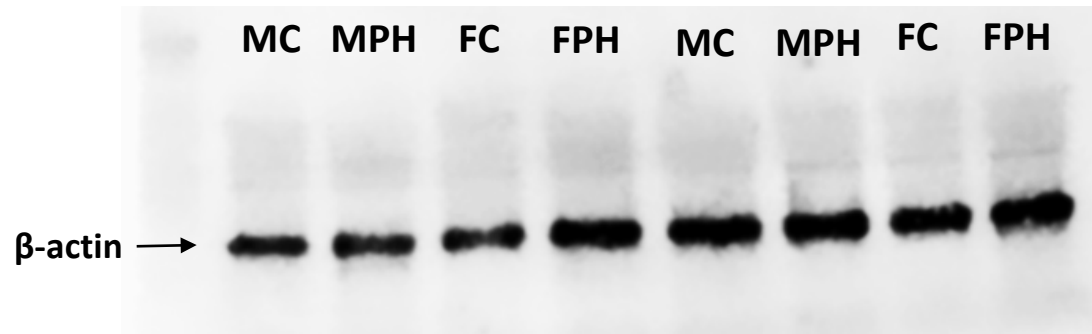**SUPPLEMENTARY FIG. S3. (Continued)**

**C****IB: E-Selectin**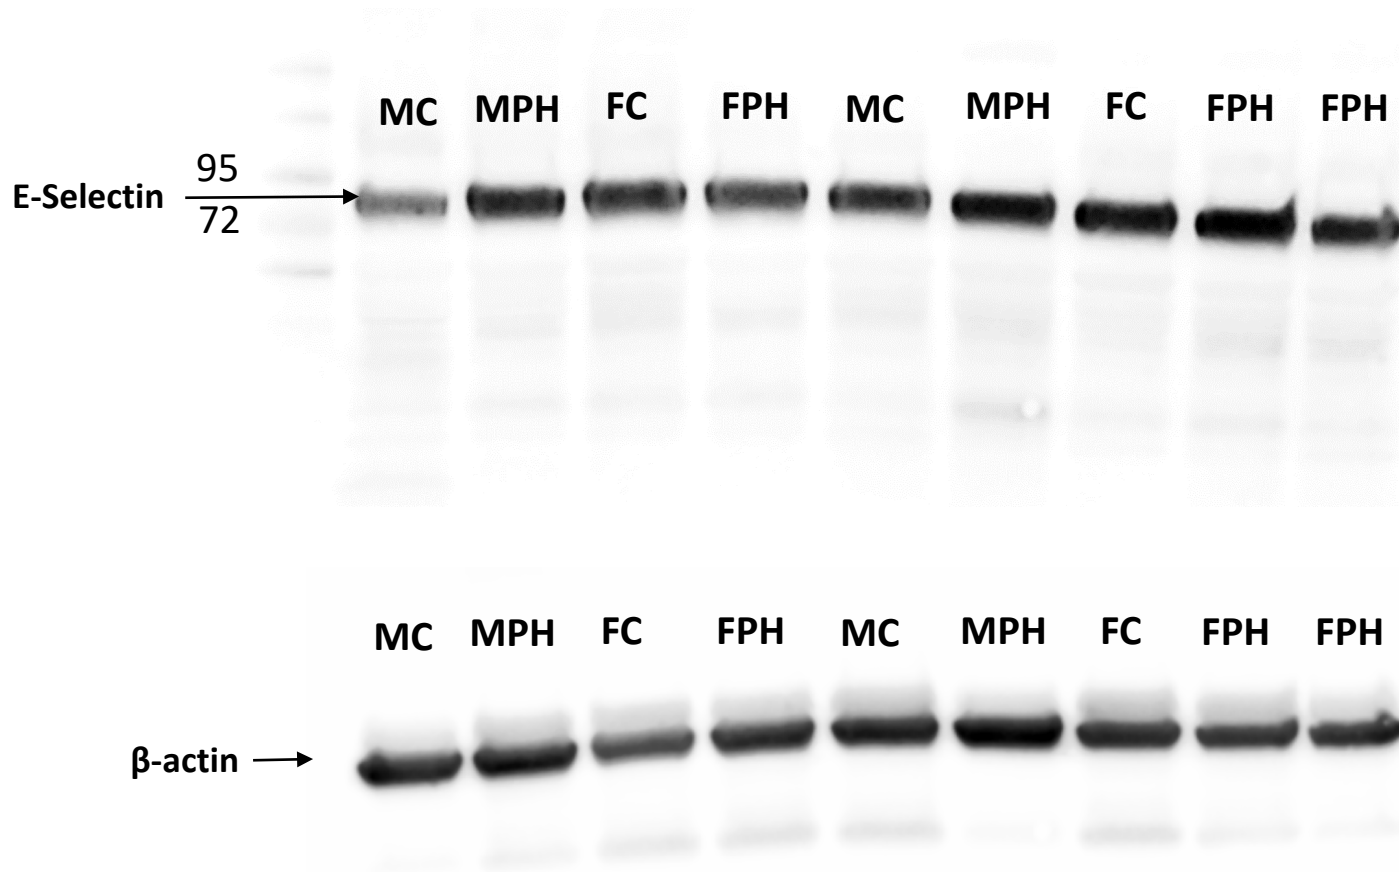**SUPPLEMENTARY FIG. S3. (Continued)**
